# Supplementary material
Source: publisher site journal article supplement (https://www.dovepress.com/get_supplementary_file.php?f=484055.docx)

**Figure S1** The representative figures for the expression of FOXP3. A) Negative expression of FOXP3; B) Positive expression of FOXP3.


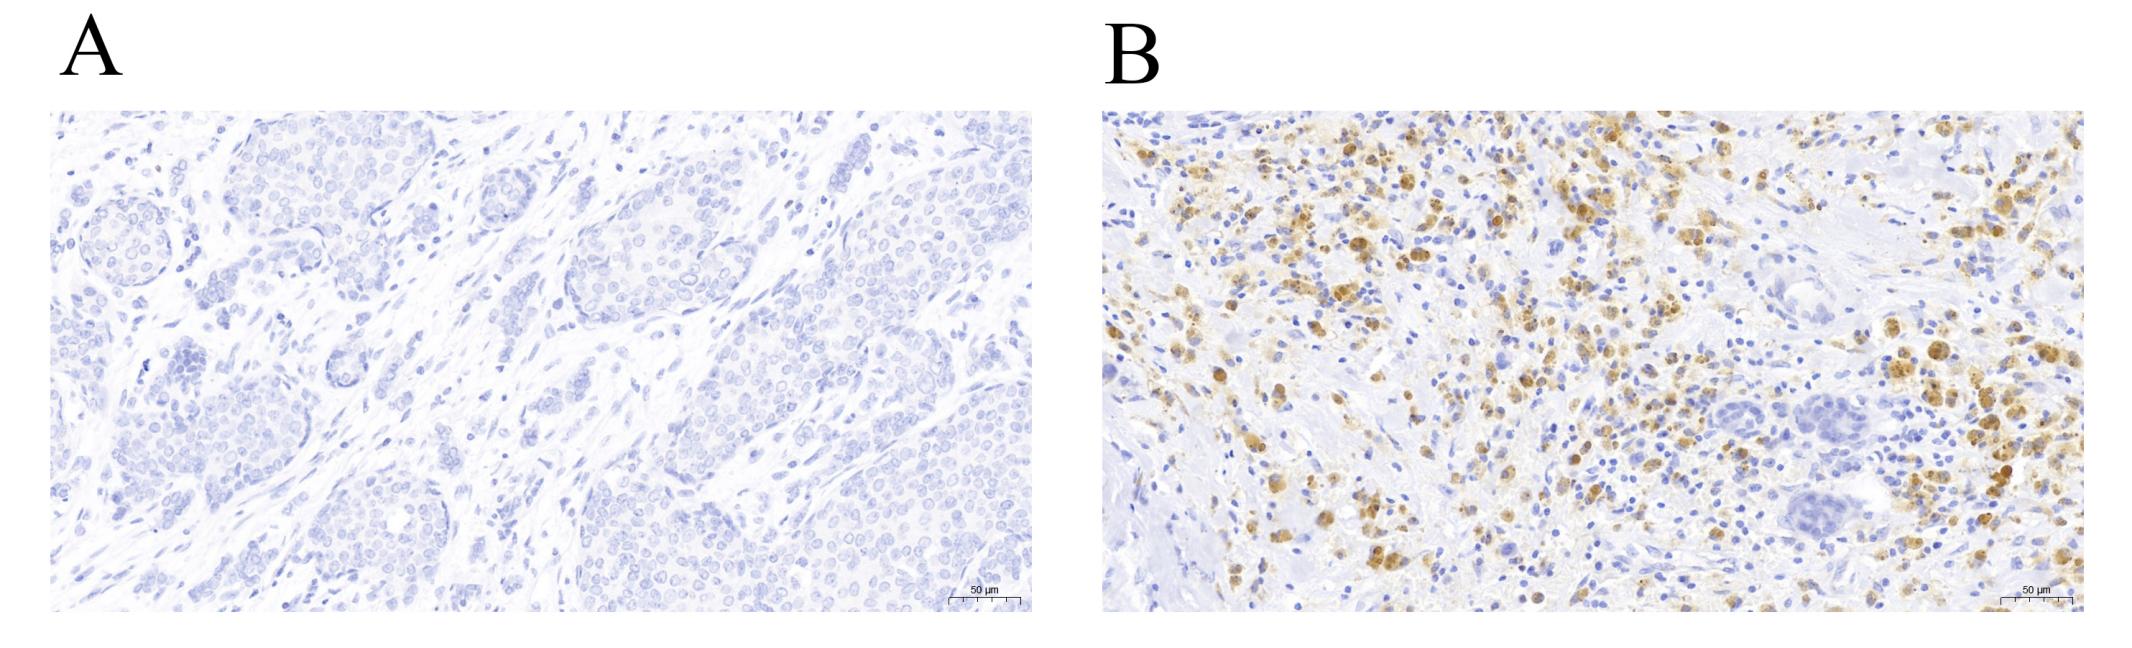


**Figure S2** Survival curve of FOXP3 expression level and prognosis in patients with breast cancer received chemotherapy for (A) disease-free survival and (B) overall survival.


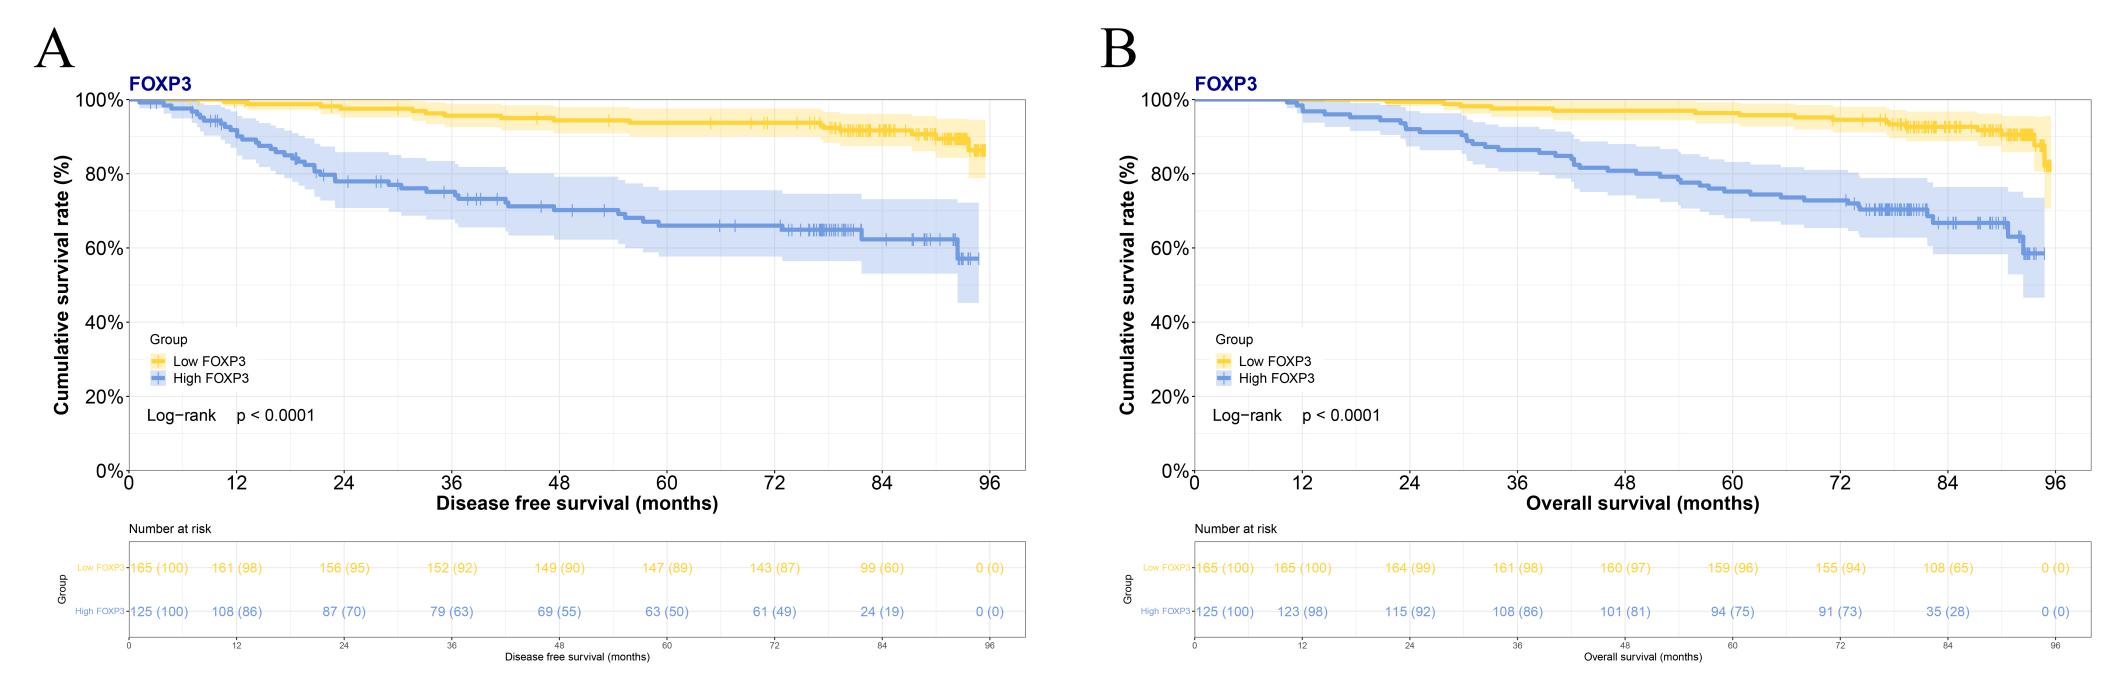


**Figure S3** Survival curve of FOXP3 expression level and prognosis in patients with breast cancer received endocrine therapy for (A) disease-free survival and (B) overall survival.


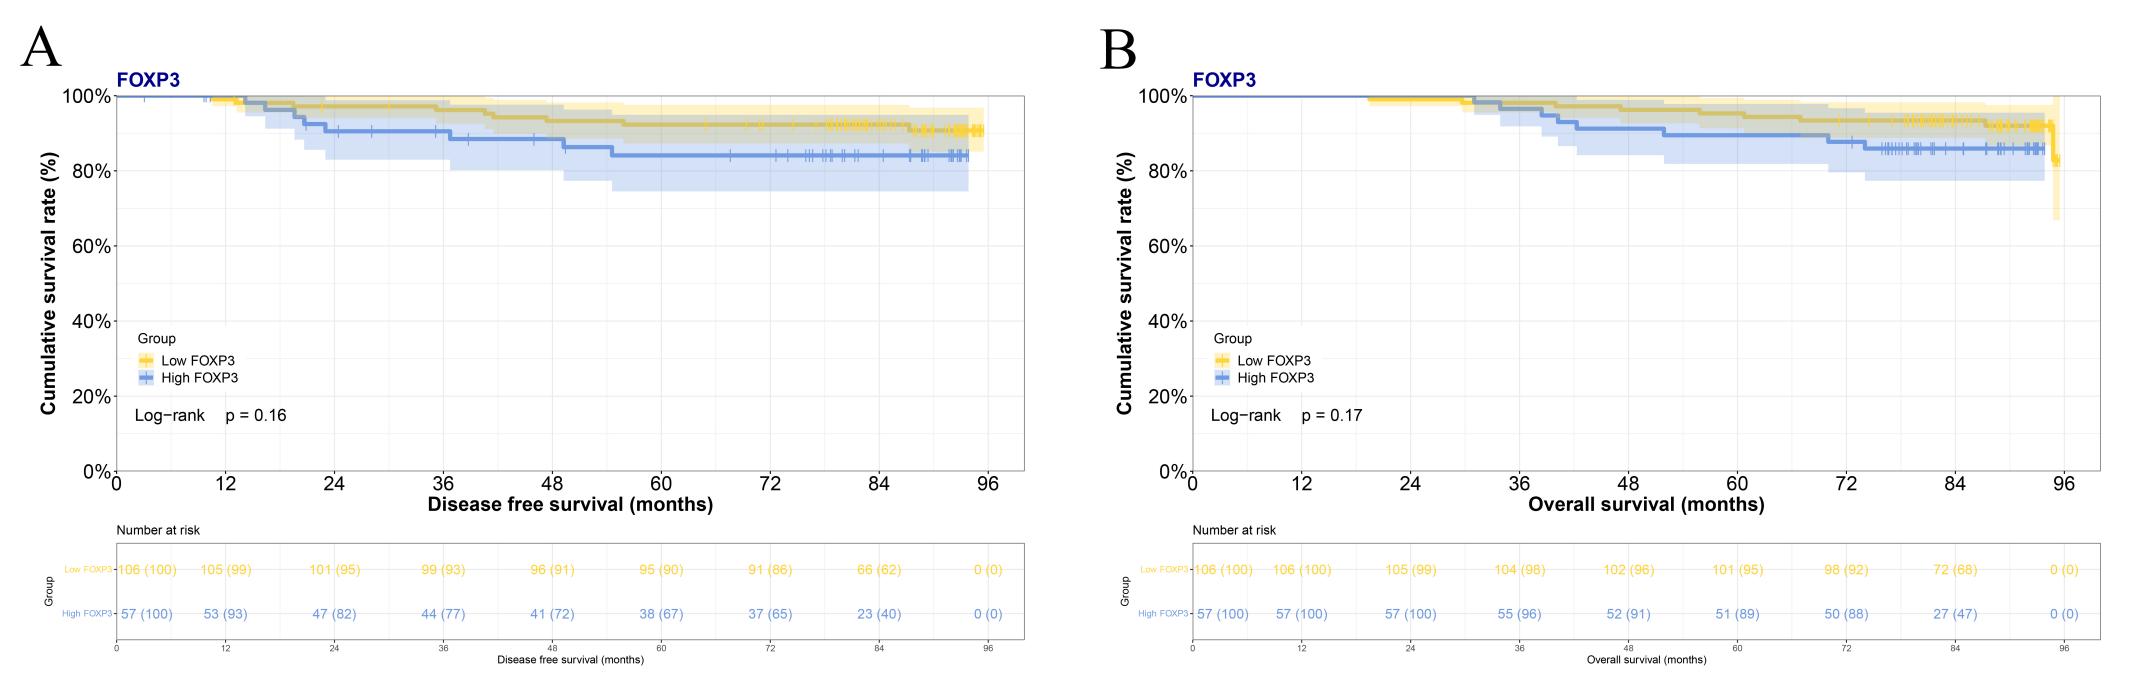


**Figure S4** Survival curve of FOXP3 expression level and prognosis in patients with breast cancer received radiotherapy for (A) disease-free survival and (B) overall survival.


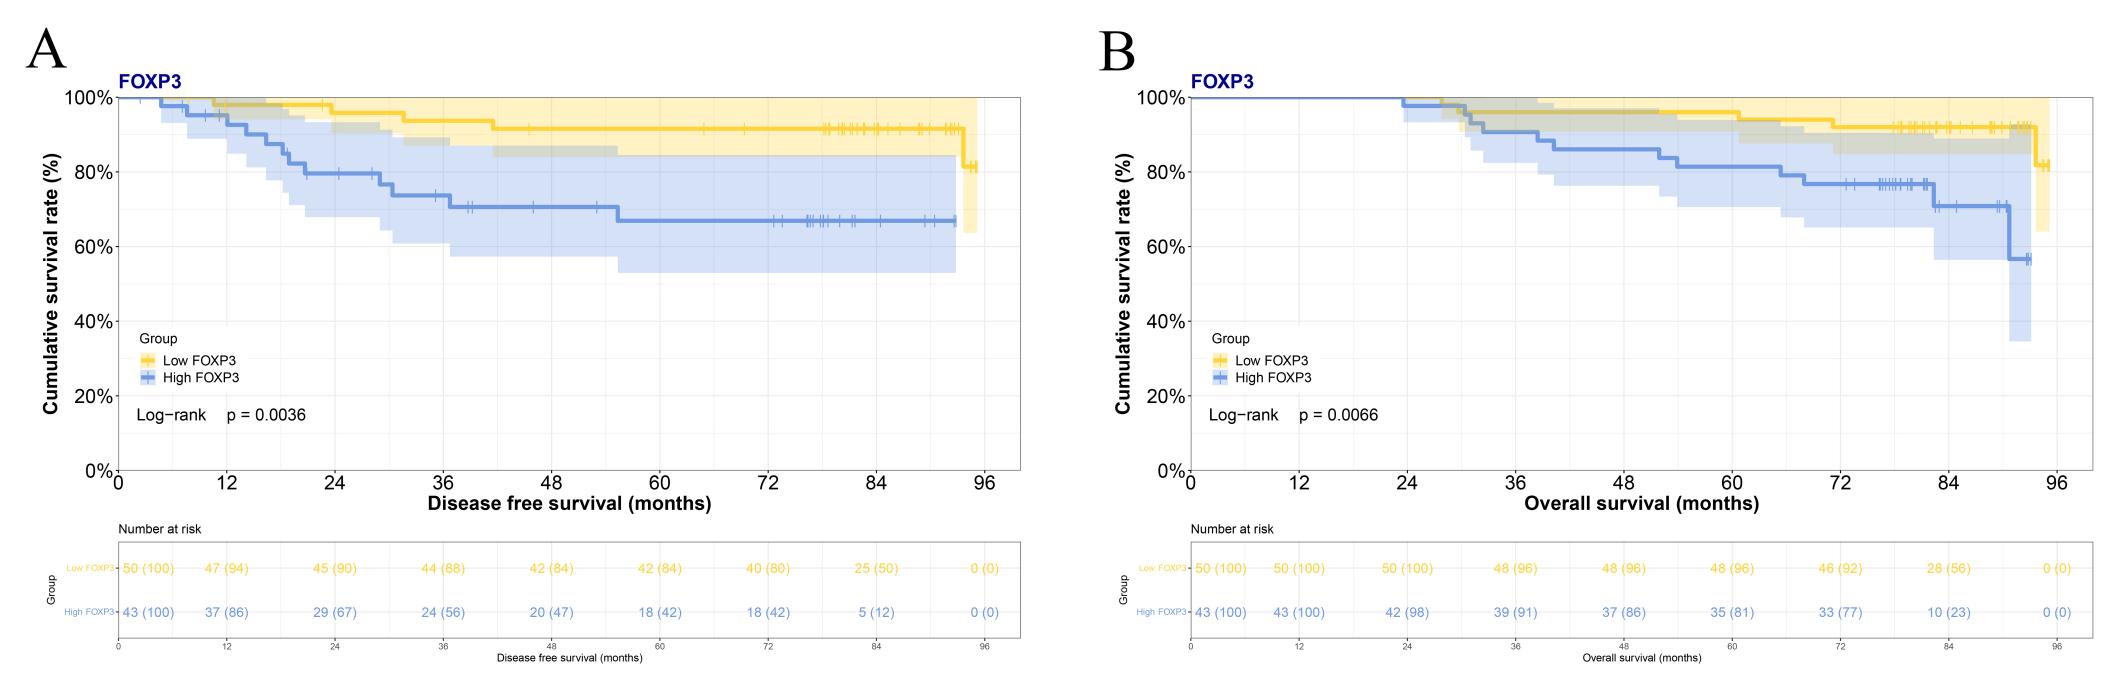


**Figure S5** Survival curve of FOXP3 expression level and prognosis in breast cancer patients with stage I for (A) disease-free survival and (B) overall survival.


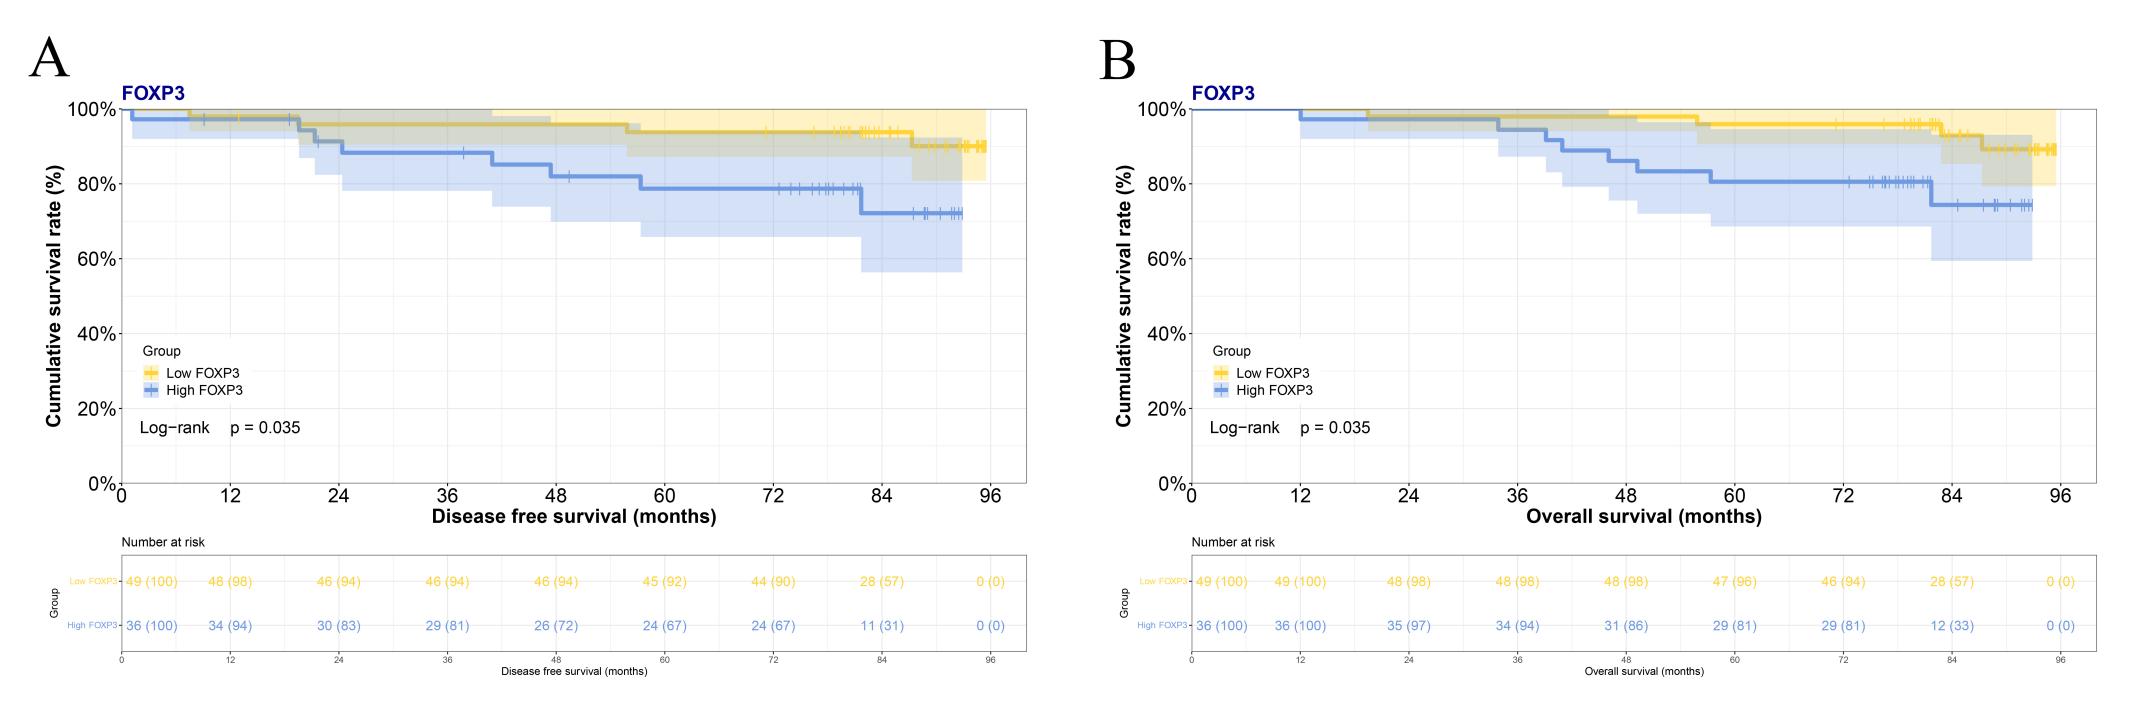


**Figure S6** Survival curve of FOXP3 expression level and prognosis in breast cancer patients with stage II for (A) disease-free survival and (B) overall survival.


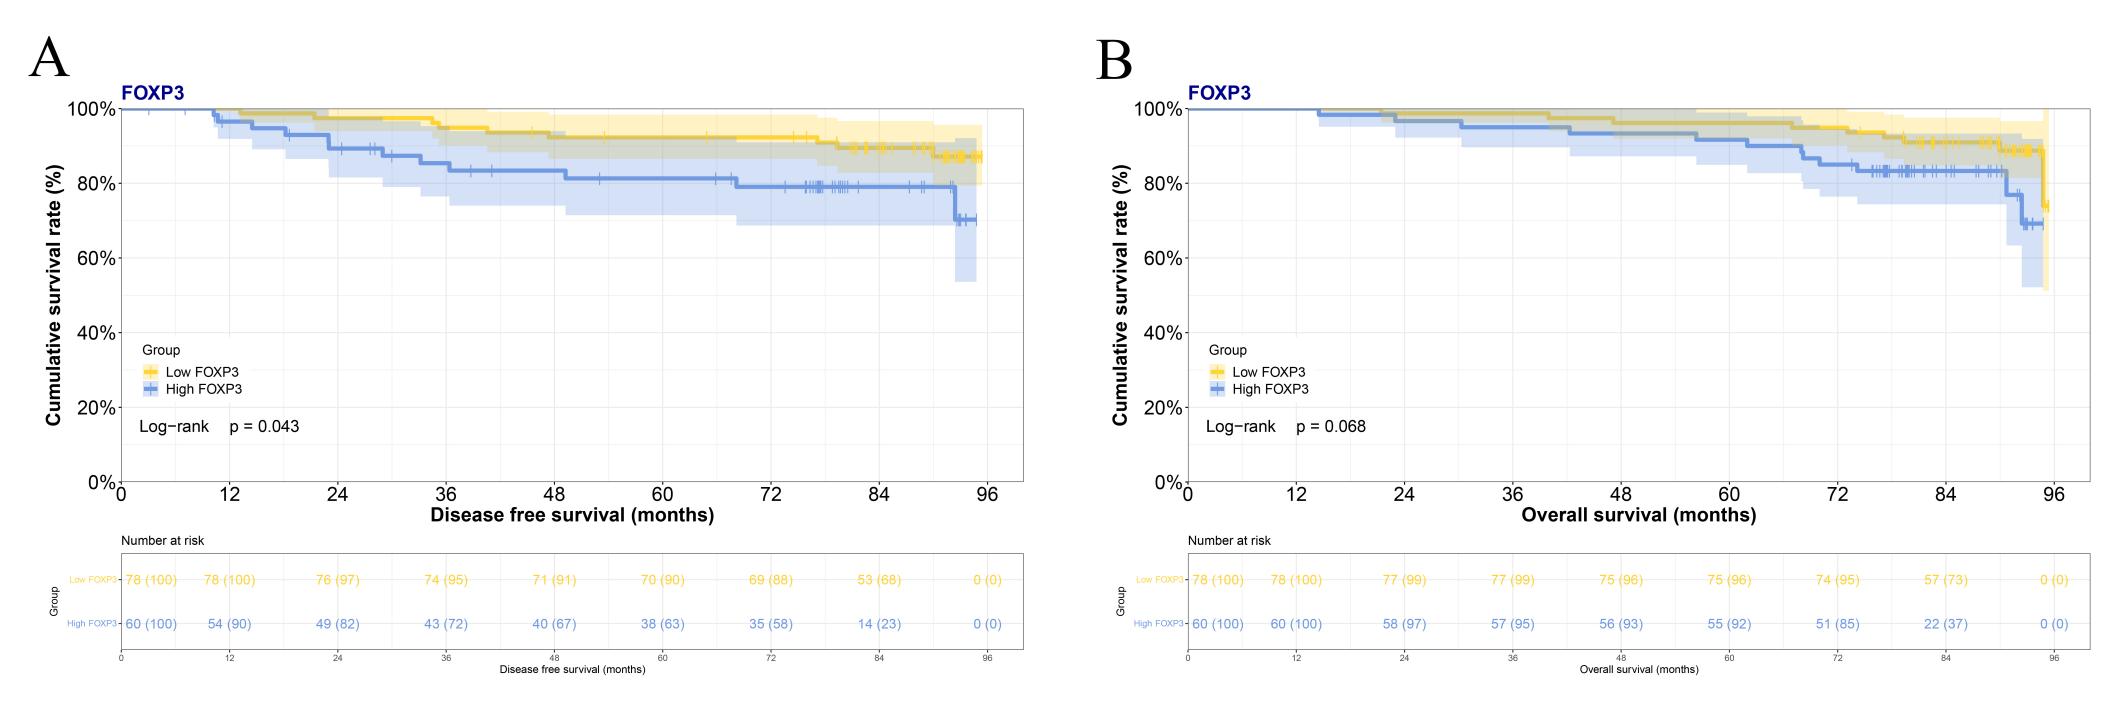


**Figure S7** Survival curve of FOXP3 expression level and prognosis in breast cancer patients with stage III for (A) disease-free survival and (B) overall survival.


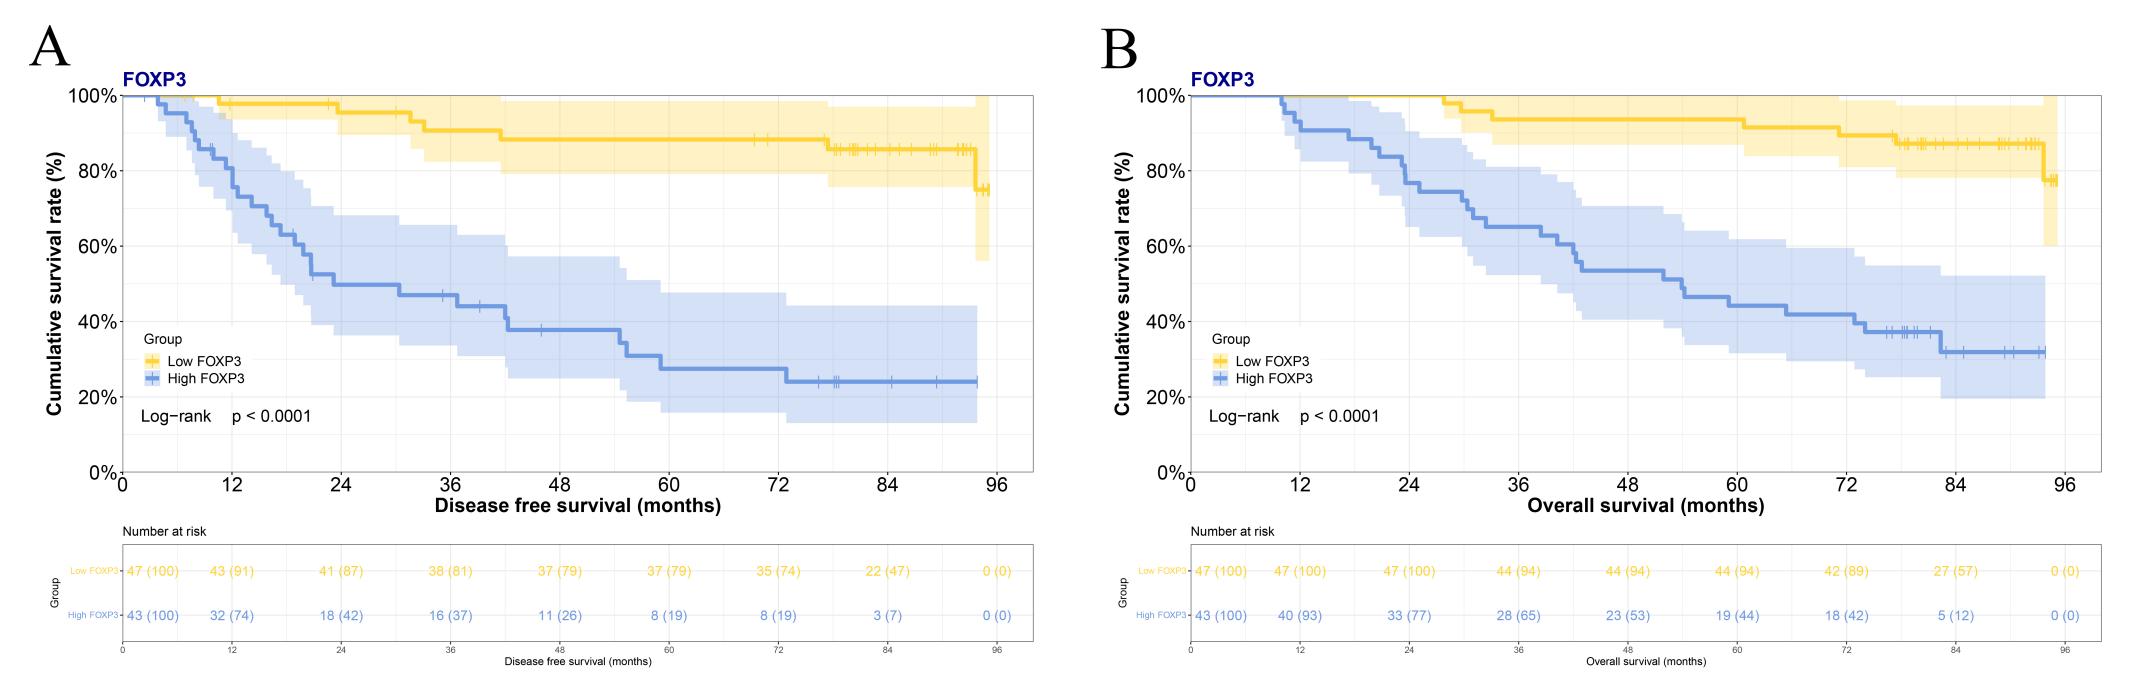

Supplement: Supplementary file 1 [file get_supplementary_file.php]
